## Oxidative stress-induced diseases and tea polyphenols

Xiangbing Mao<sup>1,2</sup>, Changsong Gu<sup>1,2</sup>, Daiwen Chen<sup>1,2</sup>, Bing Yu<sup>1,2</sup> and Jun He<sup>1,2</sup>

<sup>1</sup>Animal Nutrition Institute, Sichuan Agricultural University, Chengdu, 611130, People's Republic of China

<sup>2</sup>Key Laboratory of Animal Disease-Resistance Nutrition, Chinese Ministry of Education, Chengdu, 611130, People's Republic of China

**Correspondence to:** Xiangbing Mao, **email:** acatmxb2003@163.com

**Keywords:** oxidative stress, tea polyphenols, antioxidant capacity, pro-oxidant capacity

**Received:** June 20, 2017

**Accepted:** August 26, 2017

**Published:** September 14, 2017

Copyright: Mao et al. This is an open-access article distributed under the terms of the Creative Commons Attribution License 3.0 (CC BY 3.0), which permits unrestricted use, distribution, and reproduction in any medium, provided the original author and source are credited.

### ABSTRACT

**Reactive oxide species are the middle products of normal metabolism, and play a crucial role in cell signaling transduction. On the contrary, accumulation of excess reactive oxide species results in oxidative stress that often brings multifarious impairment to cells, including decrease of ATP level in cells, elevation of cytosolic Ca<sup>2+</sup>, DNA damage, dysfunction of biological function in lipid bilayer and so on. These effects will finally lead to all kinds of diseases. Tea polyphenols are widely considered as a kind of excellent antioxidant agents. It can be antioxidants by directly scavenging reactive oxide species or chelating transition metals, and indirectly upregulating the activity of antioxidant enzymes. In addition, tea polyphenols have also been observed a potent pro-oxidant capacity, which directly leads to the generation of reactive oxide species, and indirectly induces apoptosis and death of cancer cells. The underlying characters of its pro-oxidant activity in some diseases is not well understood. The present review we will discuss the dual character of tea polyphenols, both antioxidant and pro-oxidant properties, in some human diseases induced by oxidative stress.**

### INTRODUCTION

Tea is a popular consumed beverage worldwide [1]. According to the technology of manufacturing, tea can be classified into three major types: green tea, black tea, Oolong tea [2]. The different producing methods will lead to different chemical composition of dry leaves. Tea polyphenols, also known as catechins, is the floorboard of about 30 kinds of phenolic compounds, which are mainly including epigallocatechin-3-gallate (EGCG), epigallocatechin (EGC), epicatechin-3-gallate (ECG) and epicatechin (EC) [2] (Figure 1). And EGCG is the most abundant catechin, and may account for 50–70% of the catechins. The effective antioxidant capacity of tea polyphenols has been widely proved in lots of *in vitro* and *in vivo* studies [1, 3, 4]. This could be the critical reason that tea polyphenols, especially EGCG, have some important roles, such as anti-carcinogenic, anti-obesity, anti-inflammatory, anti-aging, anti-cancer, anti-virulence, anti-diabetic, anti-bacterial and neuro-protective effects [5–12].

The recent study have indicated that many clinical diseases will occur with oxidative damage. As an excellent antioxidant, tea polyphenols can be used to deal with these diseases via resisting oxidative damage in the body [5–12]. However, some experiments showed that tea polyphenols also act as inhibitor in cancer cells through inducing the generation of reactive oxide species (ROS) and apoptosis, and impacting the cell signaling pathway [8, 13–19]. In the present review, we will mainly discuss the antioxidant capacity of tea polyphenols and its dual characters in regulating the redox state in cells, and pay attention to summarize the possible mechanisms of these effects. This review is aiming at stimulating more researches into the role of tea polyphenols in oxidation state, and the potential mechanism for cancer prevention and cure. An overall understanding of the chemical property and biological function of tea polyphenols will be essential for understanding their ultimate virtue in preventive chronic diseases, including cancers.

## Free radicals and oxidative stress

Oxidative stress results from massive accumulation of reaction oxygen species (ROS) that is induced by a wide range of factors including radiation, pathogen invasion (hypersensitive reaction), ages, disease and heat stress [20–23] (Figure 2). Generally, ROS production (Table 1) is a physiological process that take place in every aerobic organism [24]. For example, cells release superoxide and hydrogen peroxide from mitochondria in the process of ATP formation [25]. However, development and effects of oxidative stress mainly depend on the capabilities of the organism, alone or with intervention from outside, to keep the dynamic balance of redox state. Thus, oxidative stress has been defined as a disturbance in the dynamically balance between the ROS generation and the antioxidant capacity [26], which leads to the production of an array of free radicals [24]. This often brings multifarious impairment to cells, including decrease of ATP level in cells, elevation of cytosolic  $Ca^{2+}$ , DNA damage, dysfunction of biological function in lipid bilayer, decrease of the glutathione level, impairment of electron transport chain, regulation of gene expression through activation of redox-sensitive transcription factors, modulation of inflammatory responses, and change of crucial cell signaling pathways [5, 27–32]. These effects could lead to all kinds of diseases [21, 28–34].

## Oxidative stress and human disease

Many studies indicate that ROS are involved in a good deal of physiological and pathophysiological process [5–12, 35]. The appropriate level of ROS plays a significant role as regulatory mediators in the cell signaling processes of differentiation, proliferation, apoptosis, immunity, defense against microorganism, melanogenesis and aging [36–40]. Conversely, the high level of ROS is dangerous for living organism as they are detrimental to the major cellular components. When the living organisms stay at oxidative stress state for a long time, the disease will occur in various system (Table 2).

## Oxidative stress and neurodegenerative disease

Several researches have shown that human brain is eccentrically sensitive to oxidative damage [36, 38] (Figure 3). Brain consumes an inordinate fraction (20%) of total oxygen consumption for its relatively small weight (2%), but it doesn't enrich antioxidant defenses [28]. Antioxidant activity in brain is lower than that in other tissues [41], for example, about 10% less than liver [42]. However, neuronal biochemical composition is mainly sensitive to ROS, which is due that it contains abundant unsaturated lipids that are labile to peroxidation and oxidative modification [43].

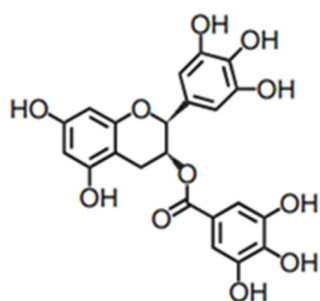

**Epigallocatechin-3-gallate (EGCG)**

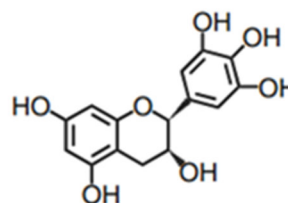

**Epigallocatechin (EGC)**

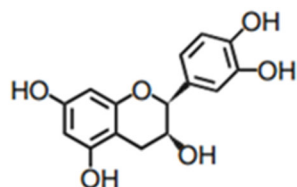

**Epicatechin (EC)**

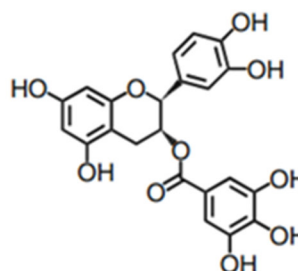

**Epicatechin-3-gallate (ECG)**

**Figure 1: The main phenolic compounds of tea polyphenols.**

**Table 1: Major reaction of oxygen species**

| Oxygen free radicals         | RNS                          | Non-radical oxidant           | Iron-oxygen complexes | Organic free radicals |
|------------------------------|------------------------------|-------------------------------|-----------------------|-----------------------|
| O <sub>2</sub>               | NO·                          | H <sub>2</sub> O <sub>2</sub> | Fe = O <sup>2+</sup>  | R-O                   |
| O <sub>2</sub> <sup>-</sup>  | NO <sub>2</sub> <sup>-</sup> | ONOOH                         | Fe = O <sup>3+</sup>  | R-OO                  |
| ·OH                          |                              | HClO                          |                       | ·QH                   |
| HO <sub>2</sub> <sup>-</sup> |                              | HOSCN                         |                       |                       |

**Table 2: Diseases that have been linked to oxidative stress**

| Disease                | Reference          |
|------------------------|--------------------|
| Neurological Disease   |                    |
| Alzheimer's Disease    | 38, 49             |
| Parkinson's Disease    | 32, 37, 83         |
| Huntington's Disease   | 84                 |
| Wilson Disease         | 85                 |
| Cancer                 | 33, 39, 50, 53, 61 |
| Aging                  | 21                 |
| Vascular Disease       | 13 58              |
| Pulmonary Disease      | 69                 |
| Diabetes               | 15 18 60           |
| Skin Disease           | 88                 |
| Chronic kidney Disease | 36, 89             |
| Inflammation           | 27, 66, 68, 69, 72 |
| Obesity                | 90                 |

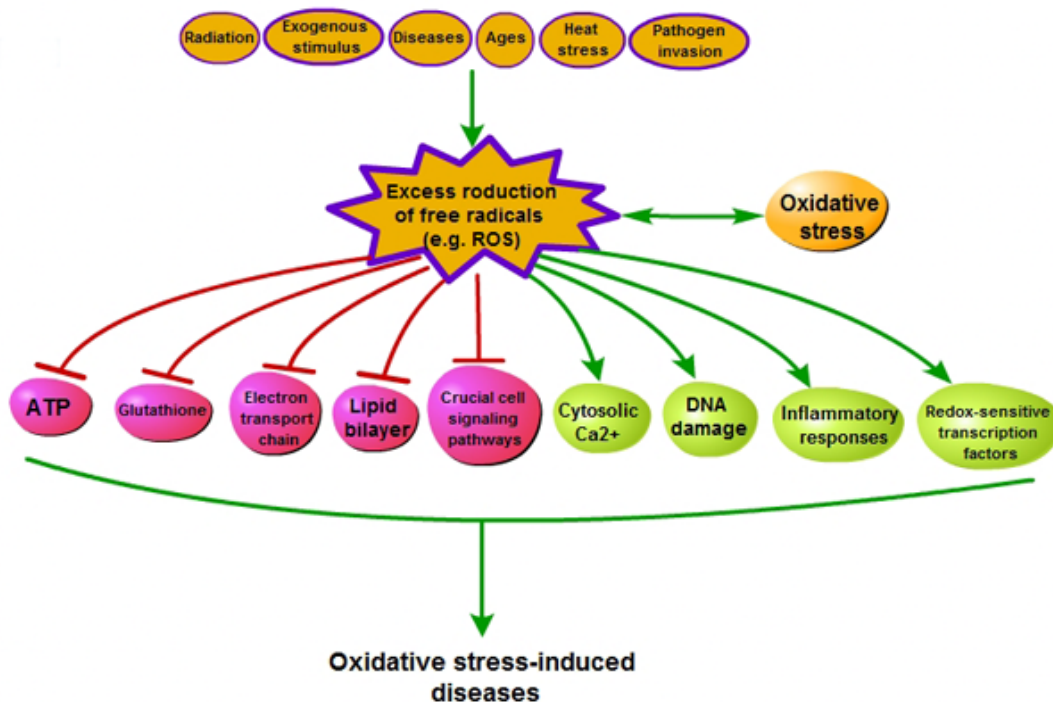

**Figure 2: The process of oxidative stress-induced diseases.**

With the oxidative stress forming, human nerve cells of brain and notochord lead to either functional loss or dysfunction perception, and further mitochondria dysfunctions, excitotoxicity and apoptosis were observed during neurodegenerative diseases [37, 38, 41]. Thus, oxidative stress, inducing production of a plenty of ROS and reactive nitrogen species (RNS), is implicated as the pathogenesis of many neurodegenerative diseases, such as Parkinson's disease, Alzheimer's disease, mutiple sclerosis and amyolotrophic lateral sclerosis [44].

### Oxidative stress and carcinogenesis

Oxidative stress derived from excess ROS production can lead to carcinogenesis in normal cells (Figure 4). ROS inducing nucleotide and lipid peroxides will directly and indirectly aggravate damage of biomolecules, including DNA (such as mtDNA and genomic DNA) in chain reactions [28]. Besides impairing the genes that are related to cell cycle control or DNA damage pathway [45], ROS-induced DNA damage gives rise to mutations involved in tumor suppressor genes or oncogens [34]. If these damages can not be properly

repaired, DNA mutations will occur, which further induces cancer in the end. This is an oncogenic mechanism of oxidative stress. Several previous clinical studies have also implicated ROS exposition with an increased risk of cancer [43, 46]. Moreover, researches on various types of cancer show a possible link between the low activity of superoxide dismutase and the high level of hydroxylated DNA base [47–50].

In addition, it has been definitively recognized that apoptosis plays an important role in controlling the tumor expansion [51]. Many studies indicated that cancers, including lymphomas, p53-mutation carcinmas and some hormone-dependent tumors (such as breast, prostate, ovarian, pancreatic and colon cancers), have the closely association with the inhibiton of apoptosis [52]. The activities of several genes known to be influential in cancer progression have been indentified as modulating cell death, especially Bcl-2, fas, and p53 [53]. Meanwhile, the inhibiton of apoptosis in tumor progression can involve some signaling pathways, such as Notch, nuclear factor-κB (NF-κB), protein kinase B (Akt) and p53 [51, 54, 55]. Researchers indicated that ROS could activate the PI3K-dependent Akt counteracted by

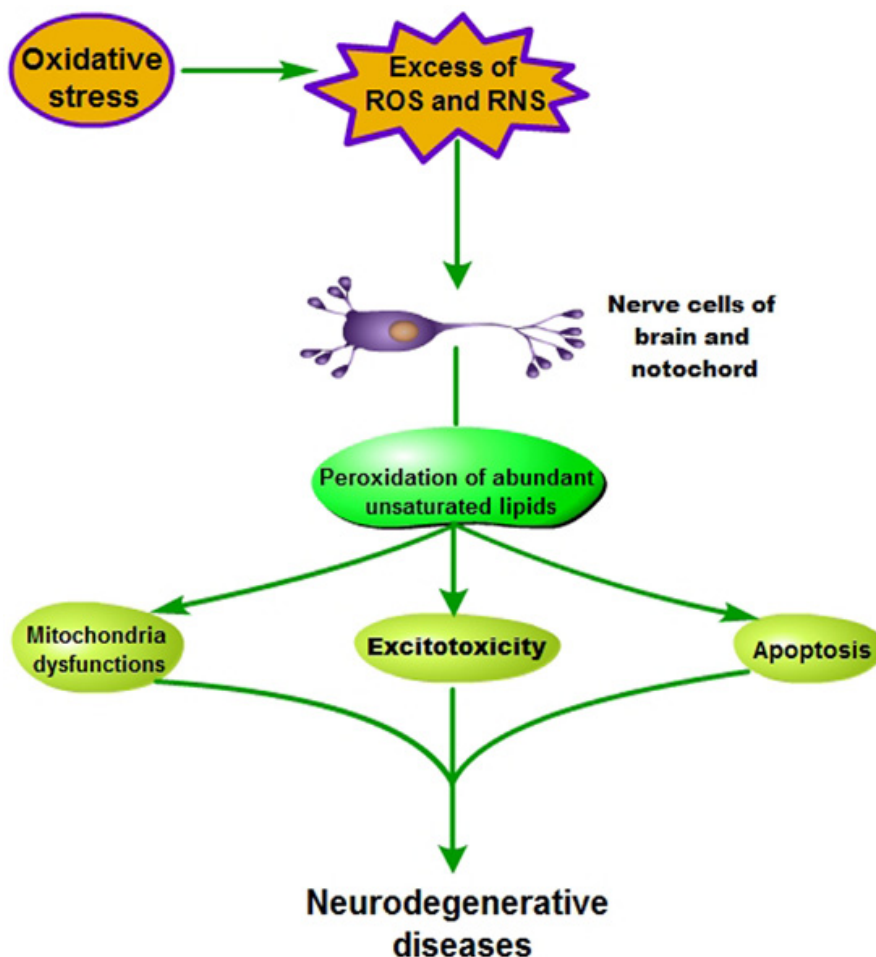

Figure 3: Pathogenesis of oxidative stress-induced neurodegenerative diseases.

phosphatase through inhibiting phosphatase and tensin homolog deleted from chromosome 10 (PTEN), and then Akt may foster tumorigenesis [54, 55]. Akt is an inhibitor of apoptosis via triggering the NF- $\kappa$ B activity and regulating pro-apoptotic molecules (such as caspase-9 and Bcl-2). Moreover, Akt affects the nuclear translocation of ubiquitin ligase MDM2, which inhibits p53-mediated apoptosis [56]. It also has been reported that there is cross-talk between Notch-1 and another major cell growth and apoptotic regulatory pathway, and the downregulation of Notch-1 resulted in the increasing cell growth inhibition and apoptosis [51].

### Oxidative stress and inflammation

The persistent oxidative stress can lead to chronic inflammation [57] (Figure 5). The relative mechanisms involve the activation of many transcription factors, such as NF- $\kappa$ B, activator protein-1 (AP-1), p53 and Nrf2, which will lead to the expression of more than 500 genes (including inflammatory cytokines), and finally trigger inflammation [46]. During oxidative stress, ROS may promote the release of damage-associated molecular pattern molecules (DAMPs) in the damaged or apoptotic cells, which stimulates toll-like receptors (TLRs) signaling, such as TLR4, in immune cells. This will induce the production of inflammatory factors, and trigger TLR4-mediated inflammation [54]. However, during

inflammation, mast cells and leukocytes are recruited to the damage site. This will lead to a ‘respiratory burst’ derived from increasing oxygen uptake, and then ROS is further released and accumulated at the damage site [55, 56]. Thus, there is a vicious circle between oxidative stress and inflammation. These also demonstrate that oxidative stress and inflammation are closely related pathophysiological processes, and both are simultaneously found in many pathological conditions [39, 57, 58].

The inflammation derived from oxidative stress in different tissues and organisms will induce different diseases. Inflammatory lung diseases, such as asthma and chronic obstructive pulmonary disease (COPD), are characterized by systemic and local chronic inflammation and oxidative stress [59]. Oxidative stress and inflammation also play an important role in lots of renal diseases, such as glomerulonephritis, tubulointerstitial nephritis, chronic renal failure, proteinuria and uremia [60, 61].

### Oxidative stress and some other diseases

Oxidative stress relates to the generation and development of some other diseases. Obesity may induce systemic oxidative stress, and oxidative stress is associated with an irregular production of adipokines that will further induce the development of metabolic syndrome [62]. Oxidative stress also plays a key role in the pathogenesis of

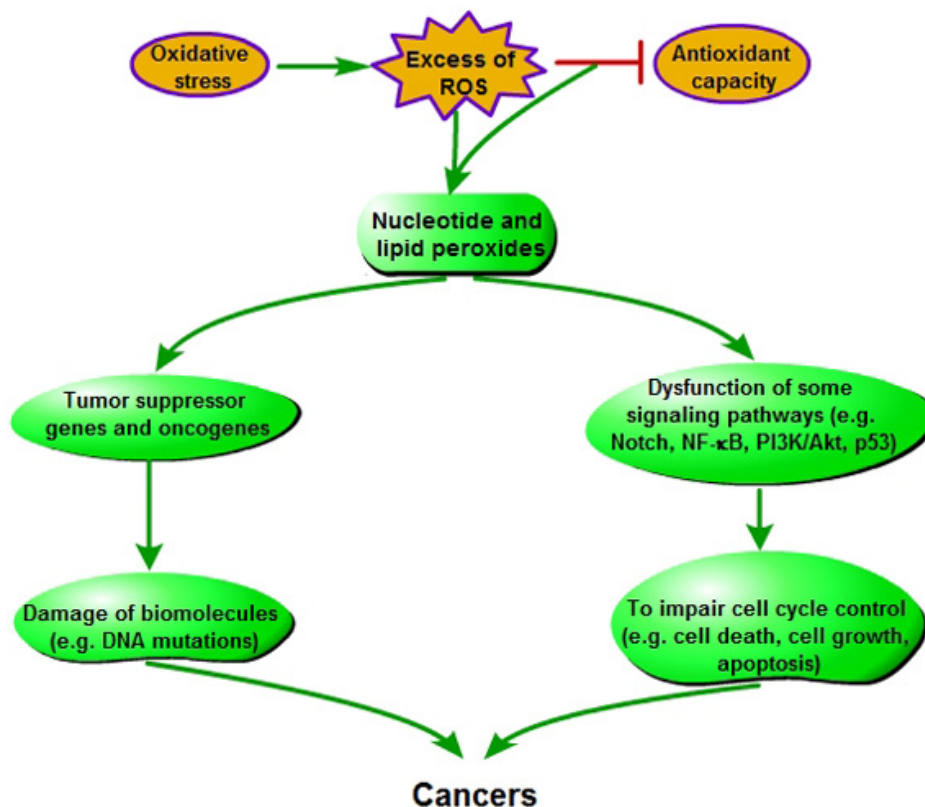

Figure 4: Pathogenesis of oxidative stress-induced carcinogenesis.

diabetes and its complications, and then insulin resistance and beta-cell dysfunction that are two central events in the pathophysiology of type 2 diabetes have been linked to redox imbalance [18, 63, 64]. In addition, the level of oxidative stress is relative with aging [65]. Oxidative stress has been found to implicate with age-related macular degeneration and cataracts by altering various cell types in the human eye [66], and excess ROS production can lead to cross-link and aggregation of the crystalline proteins in the lens, which will cause the formation of cataracts [67]. Besides these, nephrotoxicity resulted from some drugs is mainly due to oxidative stress via lipid peroxidation in kidney [68].

### Tea polyphenols and diseases triggered by oxidative stress

Green tea consumed within a balance diet is able to improve the organism redox status, rescue cells from oxidative damage, and limit the risk of various degenerative diseases associated to oxidative stress [15, 69–71]. The *in vitro* and *in vivo* studies indicate that polyphenols are derived from tea may have the bioactivity to affect the pathogenesis of several chronic disease [4, 12, 71]. Tea polyphenols curing diseases has been

partially attributed to the antioxidative capacity. And, in all tea polyphenols, EGCG is mainly responsible for antioxidant capacity.

Many studies show that administration of tea polyphenols can limit carcinogenesis, neurodegenerative diseases, inflammation, aging and renal disease [15, 19, 66, 67, 72]. Most of these diseases are associated with the damage of DNA, proteins and lipids caused by oxidative stress. Tea polyphenols can help to limit this damage via two ways. One is that it can directly act on ROS, and the other is that it may stimulate endogenous defence system [73].

### The mechanism of tea polyphenols curing diseases triggered by oxidative stress

Tea polyphenols can relieve the oxidative stress by scavenging ROS and generating more stable phenolic radicals *in vivo* and *in vitro* (Figure 6). The ability of EGCG scavenging radicals is mainly derived from the D ring in the galloyl group of its structure [17]. Following analysis of electron paramagnetic resonance spectroscopy, the .OH and O<sup>2-</sup> are scavenged by EGCG mainly through oxidating the D ring of galloyl group [22, 73]. In addition, tea polyphenols also have indirect antioxidant effects. Many studies have shown that treatment of tea

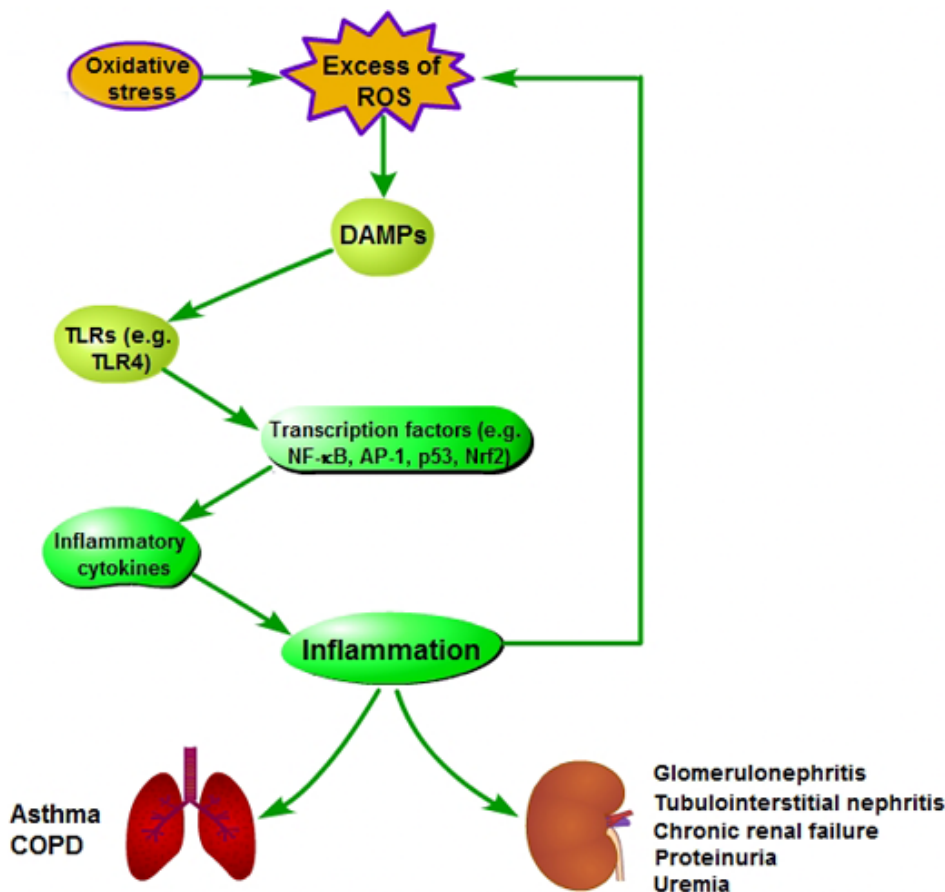

Figure 5: Pathogenesis of oxidative stress-induced inflammation.

polyphenols may increase the levels of phase II antioxidant enzymes, such as glutathione peroxidase and reductase, glutathione S-transferase, catalase, quinone reductase, and superoxide dismutase in different organs (including liver, small intestine, lung, skin, brain, prostate and oral cavity) of rodents [74–78]. Administration of tea polyphenols can decrease the level of 8-oxoguanine that is a reliable marker for DNA damage induced by oxidative stress, and inhibit DNA oxidative damage via reducing the expression of cytochromes P450 [79–82]. Therefore, tea polyphenols may cure oxidative stress-related diseases via increasing antioxidant capacity that can relieve the oxidative damage [25, 26, 83–85].

Moreover, there are some other indirect ways of tea polyphenols inhibiting disease induced by oxidative stress. In cell culture experiment, EGCG is mainly found in the cytosol [86], which indicates that biological function of EGCG may occur through EGCG metabolites or interaction between EGCG and intracellular molecules. EGCG producing the lower level of ROS, including hydrogen peroxide, will act as a messenger molecule for downstream signaling pathway [87]. However, via combining with a specific receptor (67 kD laminin receptor, 67LR), EGCG also increases some other intracellular second messengers, such as  $Ca^{2+}$ , cAMP, and cGMP [88–90]. These messengers, especially cGMP,

can activate some specific pathways, such as protein kinase B/endothelial nitric oxide synthase (Akt/eNOS) and protein kinase C $\delta$ /acidic sphingomyelinase (PKC $\delta$ /ASM). This inhibits oxidative stress, and cures the relative diseases (including cardiovascular disease, cancer and neurodegenerative disease) [25].

### Some special pathways involved in tea polyphenols inhibiting cancers

Tea and tea extractive regulating some pathways can also inhibit tumorigenesis in oral, esophageal, forestomach, stomach, intestinal, colon, skin, liver, bladder, prostate and breast cancers [3, 91–93] (Figure 7). (1) Tea polyphenols can induce apoptosis and cell cycle arrest of cancer cells via regulating caspase-3 activation, nuclear condensation, and the expression of Bax, Bcl-2, p21 and p27 (p27Kip1). (2) Tea polyphenols, especially EGCG, can modulate NF- $\kappa$ B, MAPKs, proteasome, epidermal growth factor receptor (EGFR)-mediated, and insulin-like growth factor-I-mediated signaling pathway in cancers. (3) The expressions of some proteins, including AP-1, cyclooxygenase-2 (COX-2), vascular endothelial growth factor (VEGF), matrix metalloproteinase (MMP) and urokinase-plasminogen activator (uPA), are inhibited by tea polyphenols in cancers.

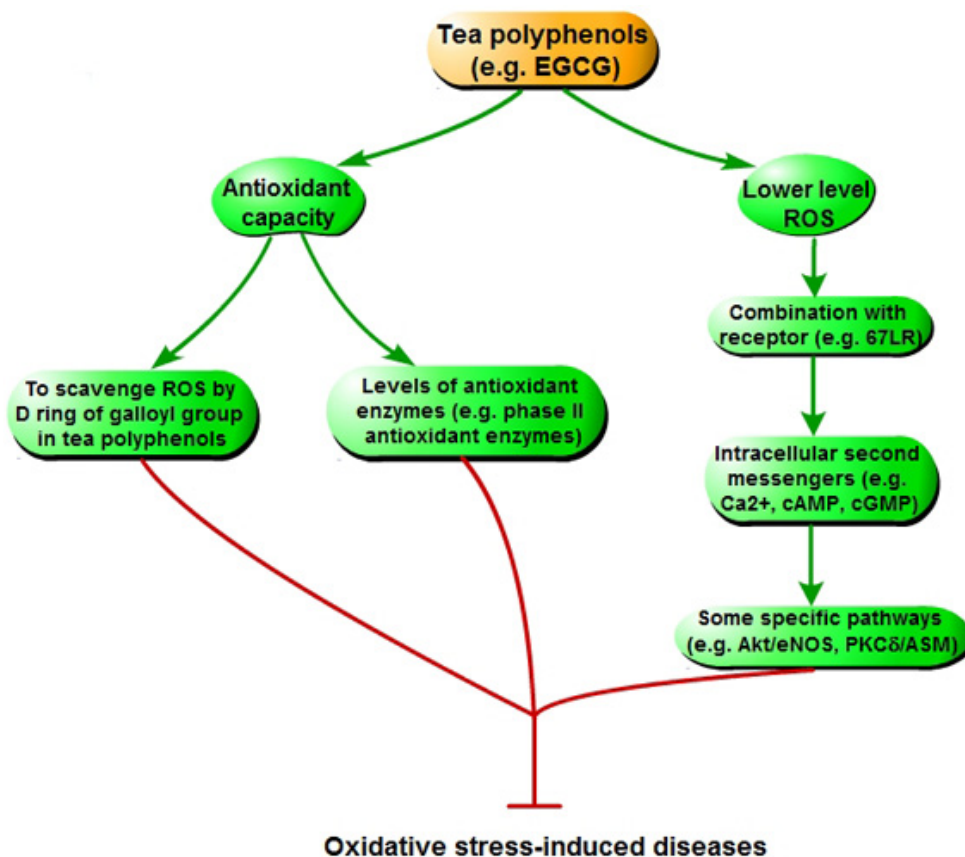

Figure 6: The mechanism of tea polyphenols curing diseases triggered by oxidative stress.

## Pro-oxidant activities of tea polyphenols

Although tea polyphenols have generally been regarded as antioxidant, some evidence for its pro-oxidant property is interesting. Tea polyphenols are unstable, and undergo autooxidative reactions resulting in ROS production *in vivo* and *in vitro* (like H<sub>2</sub>O<sub>2</sub>) [94, 95]. Some reports have shown that tea polyphenols are the apoptosis-inducing agent presenting in the popular beverage [96], increase phosphorylation of histone 2A.X ( $\gamma$ H2A.X) that is a marker of oxidative DNA damage, and enhance the expression of oxidative stress-relative genes, such as *katB*, *sodM*, *ohr*, *lexA* and *recN*. This can be an important mechanism that tea polyphenols inducing the death of cells via the pro-oxidant property may inhibit carcinogenesis [3] (Figure 7). In the *in vitro* experiments, tea polyphenols, such as EGCG and EGC, inhibiting prostate cancer cells is a dose-dependent and pH-value-dependent process [97, 98]. Besides these, the recent study have also shown that, compared with normal cells, cancer cells are more sensitive to pro-oxidant activity of tea polyphenols [99].

All the time, tea polyphenols are generally regarded as health promotion agents. However, the high dose of tea polyphenols triggering pro-oxidant activities exists the potential toxic effects in normal hepatocyte and livers, and this cytotoxicity is time- and dose-dependent [100, 101]. Thus, there is a hepatotoxicity risk of tea polyphenols in humans.

## The different effect of tea polyphenols derived from different teas on antioxidant status

Recent studies have shown that tea polyphenols derived from different teas have different effect on oxidative stress-induced diseases [102–104]. Nowadays, there are three main types of tea consumed by human, including green tea, Oolong tea and black tea. Oolong tea is manufactured by a partial oxidation of the leaf, which is intermediate between the processes for green and black tea [105]. Green and black teas have strong antioxidant property in *in vivo* and *in vitro* studies, and green tea has higher antioxidant capacity than fermented teas, such as Oolong tea and black tea [106, 107]. Based on Ferric reducing antioxidant power assay, the lower antioxidant capacity in fermented teas can be due to the decreased content of polyphenols in the fermentation process [108]. However, by using oxygen-radical absorbance capacity assay and Trolox equivalent antioxidant capacity assay in the *in vitro* studies, black tea extract has comparable antioxidant capacity to green tea extract [109, 110]. The further study showed that black tea extract could protect tissues against oxidative damage derived from lipid peroxidation, and are more effective than green tea extract in scavenging superoxide anion [111]. In addition, Oolong tea extract has higher antioxidant capacity and lipoxygenase inhibitory activity than black tea extract [105], but the biological effect of Oolong tea remains unclear.

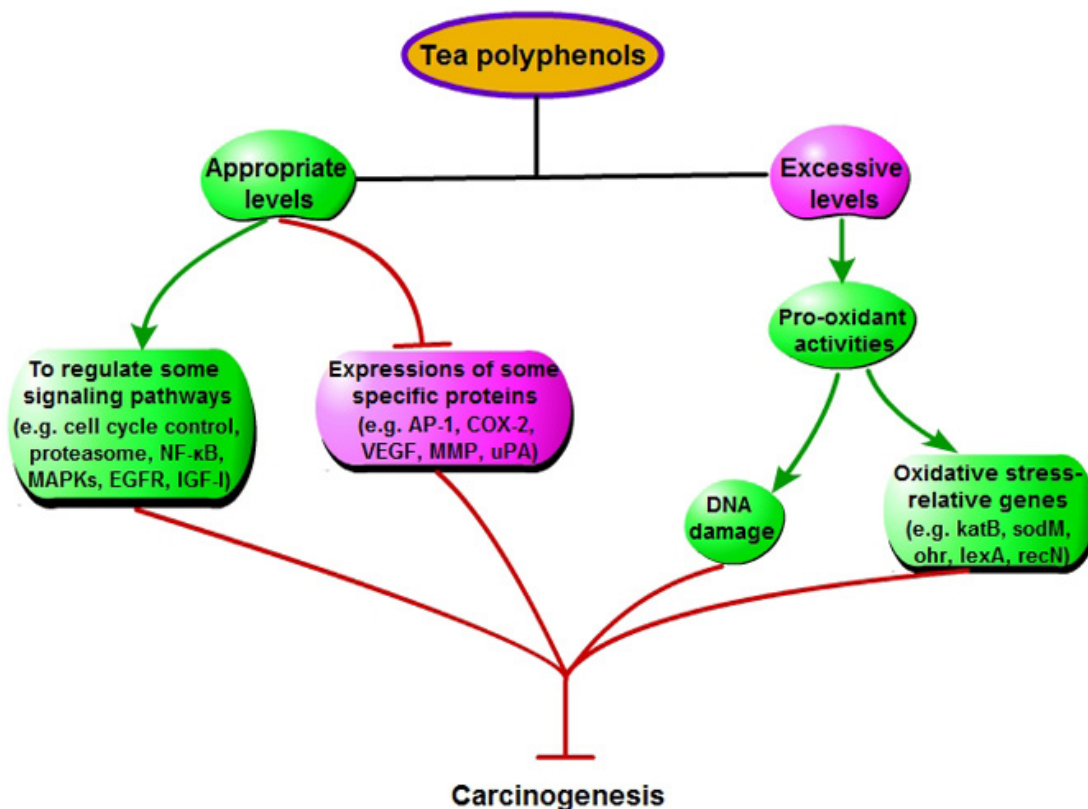

Figure 7: Some special mechanisms that tea polyphenols inhibit cancers, except increasing antioxidant capacity.



The different effect of polyphenols derived from three teas on antioxidant status could be associated with the concentration of monomeric and polymers polyphenols. Black tea contains lower amounts of monomeric polyphenols and higher concentrations of polymers, compared with green tea [112, 113]. Oolong tea are partially oxidized, which leads to an intermediate tea with a lower concentration of polymeric polyphenols and higher concentrations of EGCG, compared with black tea [113].

## CONCLUSIONS

Tea is a popular, socially accepted, safe and healthy beverage that is widely consumed around the world. Tea is beneficial to prevent and cure a variety of diseases related to oxidative stress. As one of mainly active compounds in tea, tea polyphenols act as an excellent antioxidant through regulating both endogenous and exogenous antioxidant mechanism, which have been clearly demonstrated in the *in vitro* and *in vivo* studies. In addition, some studies have indicated that tea polyphenols have pro-oxidant activity, which can reduce the risk of some types of cancer via ROS-mediated cancer cell death. Although there are a plenty of important results of tea polyphenols protecting the body via regulating the redox status, some further studies, such as its specific mechanism of anti-chronic diseases, need to be done. And the *in vivo* evidences about the mechanism of its anti-cancer activity should also be further afforded.

## ACKNOWLEDGMENTS AND FUNDING

Special thanks to Professor De Wu of Sichuan Agricultural University and Dr. Judy Deng of Oklahoma State University for revising this manuscript. This work was supported by the grant from the China Agriculture Research System (CARS-35), the grant from Major Project of Education Department of Sichuan Province (17ZA0311), and the fund from the research program of “Sheng Yang” students’ association (B2016010).

## CONFLICTS OF INTEREST

None.

## REFERENCES

1. Graham HN. Green tea composition, consumption, and polyphenol chemistry. *Prev Med.* 1992; 21:334–50. [https://doi.org/10.1016/0091-7435\(92\)90041-F](https://doi.org/10.1016/0091-7435(92)90041-F).
2. Stoner GD, Mukhtar H. Polyphenols as cancer chemopreventive agents. *J Cell Biochem.* 1995; 59:169–80. <https://doi.org/10.1002/jcb.240590822>.
3. Lambert JD, Elias RJ. The antioxidant and pro-oxidant activities of green tea polyphenols: a role in cancer prevention. *Arch Biochem Biophys.* 2010; 501:65–72. <https://doi.org/10.1016/j.abb.2010.06.013>.
4. Frei B, Higdon JV. Antioxidant activity of tea polyphenols *in vivo*: evidence from animal studies. *J Nutr.* 2003; 133: 3275S-84S.
5. Yang CS, Lambert JD, Sang S. Antioxidative and anti-carcinogenic activities of tea polyphenols. *Arch Toxicol.* 2009; 83:11–21. <https://doi.org/10.1007/s00204-008-0372-0>.
6. Lin JK, Lin-Shiau SY. Mechanisms of hypolipidemic and anti-obesity effects of tea and tea polyphenols. *Mol Nutr Food Res.* 2006; 50:211–7. <https://doi.org/10.1002/mnfr.200500138>.
7. Tipoe GL, Leung TM, Hung MW, Fung ML. Green tea polyphenols as an anti-oxidant and anti-inflammatory agent for cardiovascular protection. *Cardiovasc Hematol Disord Drug Targets.* 2007; 7:135–44. <https://doi.org/10.2174/187152907780830905>.
8. Bhattacharya U, Mukhopadhyay S, Giri AK. Comparative antimutagenic and anticancer activity of three fractions of black tea polyphenols thearubigins. *Nutr Cancer.* 2011; 63:1122–32. <https://doi.org/10.1080/01635581.2011.605985>.
9. Yin H, Deng Y, Wang H, Liu W, Zhuang X, Chu W. Tea polyphenols as an antivirulence compound Disrupt Quorum-Sensing Regulated Pathogenicity of *Pseudomonas aeruginosa*. *Sci Rep.* 2015; 5:17987. <https://doi.org/10.1038/srep16158>.
10. Zhang J, Li L, Kim SH, Hagerman AE, Lü J. Anti-Cancer, anti-diabetic and other pharmacologic and biological activities of penta-galloyl-glucose. *Pharm Res.* 2009; 26:2066–80. <https://doi.org/10.1007/s11095-009-9932-0>.
11. Fukai K, Ishigami T, Hara Y. Antibacterial activity of tea polyphenols against phytopathogenic bacteria. *Agric Biol Chem.* 1991; 55:1895–7.
12. Mo J, Chen Y, Huang L, Zhang H, Li J, Zhou W. Neuroprotective effect of tea polyphenols on oxyhemoglobin induced subarachnoid hemorrhage in mice. *Oxid Med Cell Longev.* 2013; 2013: 743938. <https://doi.org/10.1155/2013/743938>.
13. Förstermann U. Oxidative stress in vascular disease: causes, defense mechanisms and potential therapies. *Nat Clin Pract Cardiovasc Med.* 2008; 5:338–49. <https://doi.org/10.1038/ncpcardio1211>.
14. Pierrou S, Broberg P, O'Donnell RA, Pawlowski K, Virtala R, Lindqvist E, Richter A, Wilson SJ, Angco G, Möller S, Bergstrand H, Koopmann W, Wieslander E, et al. Expression of genes involved in oxidative stress responses in airway epithelial cells of smokers with chronic obstructive pulmonary disease. *Am J Respir Crit Care Med.* 2007; 175:577–86. <https://doi.org/10.1164/rccm.200607-931OC>.
15. Sabu MC, Smitha K, Kuttan R. Anti-diabetic activity of green tea polyphenols and their role in reducing oxidative stress in experimental diabetes. *J Ethnopharmacol.* 2002; 83:109–16. [https://doi.org/10.1016/S0378-8741\(02\)00217-9](https://doi.org/10.1016/S0378-8741(02)00217-9).

16. Hong J, Lu H, Meng X, Ryu JH, Hara Y, Yang CS. Stability, cellular uptake, biotransformation, and efflux of tea polyphenol (–)-epigallocatechin-3-gallate in HT-29 human colon adenocarcinoma cells. *Cancer Res.* 2002; 62:7241–6.
17. Severino JF, Goodman BA, Kay CW, Stolze K, Tunega D, Reichenauer TG, Pirker KF. Free radicals generated during oxidation of green tea polyphenols: electron paramagnetic resonance spectroscopy combined with density functional theory calculations. *Free Radic Biol Med* 2009; 46:1076–88. <https://doi.org/10.1016/j.freeradbiomed.2009.01.004>.
18. Rains JL, SK Jain. Oxidative stress, insulin signaling, and diabetes. *Free Radic Biol Med.* 2011; 50:567–75.
19. Shen CL, Samathanam C, Graham S, Dagda RY, Chyu MC, Dunn DM. Green tea polyphenols and 1- $\alpha$ -OH-vitamin D<sub>3</sub> attenuate chronic inflammation-induced myocardial fibrosis in female rats. *J Med Food.* 2012; 15:269–77. <https://doi.org/10.1089/jmf.2011.0163>.
20. Blokhina O, Virolainen E, Fagerstedt KV. Antioxidants, oxidative damage and oxygen deprivation stress: a review. *Ann Bot.* 2003; 91:179–94. <https://doi.org/10.1093/aob/mcf118>.
21. Finkel T, Holbrook NJ. Oxidants, oxidative stress and the biology of ageing. *Nature.* 2000; 408:239–47. <https://doi.org/10.1038/35041687>.
22. Ikeda M, Kodama H, Fukuda J, Shimizu Y, Murata M, Kumagai J, Tanaka T. Role of radical oxygen species in rat testicular germ cell apoptosis induced by heat stress. *Biol Reprod.* 1999; 61:393–9. <https://doi.org/10.1095/biolreprod61.2.393>.
23. Bhatnagar A. Biochemical mechanism of irreversible cell injury caused by free radical-initiated reaction. *Mol Cell Biochem.* 1994; 137:9–16. <https://doi.org/10.1007/BF00926034>
24. Halliwell B. Biochemistry of oxidative stress. *Biochem Soc Trans.* 2007; 35:1147–50. <https://doi.org/10.1042/BST0351147>.
25. Palmer RM, Ferrige AG, Moncada S. Nitric oxide release accounts for the biological activity of endothelial-derived relaxing factor. *Nature.* 1987; 327:524–6. <https://doi.org/10.1038/327524a0>.
26. Bodamyali T, Stevens CR, Blake DR, Winyard PG. Reactive oxygen/nitrogen species and acute inflammation: a physiological process. In: Winyard PG, Blake DR, Evans CH, eds. *Free radicals and inflammation.* Birkhäuser Basel. 2000. <https://doi.org/10.1007/978-3-0348-8482-2>.
27. Fu PP, Xia Q, Hwang HM, Ray PC, Yu H. Mechanisms of nanotoxicity: generation of reactive oxygen species. *J Food Drug Anal.* 2014; 22:64–75. <https://doi.org/10.1016/j.jfda.2014.01.005>.
28. Váli L, Hahn O, Kupcsulik P, Drahos A, Sárváry E, Szentmihályi K, Pallai Z, Kurucz T, Sípó P, Blázovics A. Oxidative stress with altered element content and decreased ATP level of erythrocytes in hepatocellular carcinoma and colorectal liver metastases. *Eur J Gastroenterol Hepatol.* 2008; 20:393–8. <https://doi.org/10.1097/MEG.0b013e3282f495c7>.
29. Nicotera P, McConkey D, Svensson SA, Bellomo G, Orrenius S. Correlation between cytosolic Ca<sup>2+</sup> concentration and cytotoxicity in hepatocytes exposed to oxidative stress. *Toxicology.* 1988; 52:55–63. [https://doi.org/10.1016/0300-483X\(88\)90196-5](https://doi.org/10.1016/0300-483X(88)90196-5).
30. Liang R, Zhang JP, Skibsted LH. Evaluation of physical integrity of lipid bilayer under oxidative stress: application of fluorescence microscopy and digital image processing. *Methods Mol Biol.* 2015; 1208:111–21. [https://doi.org/10.1007/978-1-4939-1441-8\\_9](https://doi.org/10.1007/978-1-4939-1441-8_9).
31. Miura K, Ishii T, Sugita Y, Bannai S. Cystine uptake and glutathione level in endothelial cells exposed to oxidative stress. *Am J Physiol.* 1992; 262: C50-8.
32. Abdulwahid Arif I, Ahmad Khan H. Environmental toxins and Parkinson's disease: putative roles of impaired electron transport chain and oxidative stress. *Toxicol Ind Health.* 2010; 26:121–8. <https://doi.org/10.1177/0748233710362382>.
33. Valko M, Rhodes CJ, Moncol J, Izakovic M, Mazur M. Free radicals, metals and antioxidants in oxidative stress-induced cancer. *Chem Biol interact.* 2006; 160:1–40. <https://doi.org/10.1016/j.cbi.2005.12.009>.
34. Baynes JW, Thorpe SR. Role of oxidative stress in diabetic complications: a new perspective on an old paradigm. *Diabetes.* 1999; 48:1–9. <https://doi.org/10.2337/diabetes.48.1.1>.
35. Johar S, MacCarthy PA, Shah AM. Oxidative stress and cardiovascular disease. In: Singh KK, eds. *Oxidative stress, disease and cancer.* World Scientific. 2006. [https://doi.org/10.1142/9781860948046\\_0016](https://doi.org/10.1142/9781860948046_0016).
36. Cachofeiro V, Goicochea M, de Vinuesa SG, Oubiña P, Lahera V, Luño J. Oxidative stress and inflammation, a link between chronic kidney disease and cardiovascular disease. *Kidney Int.* 2008; 74:S4–9. <https://doi.org/10.1038/ki.2008.516>.
37. Subramaniam SR, Chesselet MF. Mitochondrial dysfunction and oxidative stress in Parkinson's disease. *Prog Neurobiol.* 2013; 106–107:589–97. <https://doi.org/10.1016/j.pneurobio.2013.04.004>.
38. Zana M, Janka Z, Kálmán J. Oxidative stress: a bridge between Down's syndrome and Alzheimer's disease. *Neurobiol Aging.* 2007; 28:648–76. <https://doi.org/10.1016/j.neurobiolaging.2006.03.008>.
39. Reuter S, Gupta SC, Chaturvedi MM, Aggarwal BB. Oxidative stress, inflammation, and cancer: how are they linked? *Free Radic Biol Med.* 2010; 49:1603–16. <https://doi.org/10.1016/j.freeradbiomed.2010.09.006>.
40. Todorova I, Simeonova G, Kyuchukova D, Dinev D, Gadjeva V. Reference values of oxidative stress parameters (MDA, SOD, CAT) in dogs and cats. *Comp Clin Path.* 2005; 12:190–4. <https://doi.org/10.1007/s00580-005-0547-5>.

41. Uttara B, Singh AV, Zamboni P, Mahajan RT. Oxidative stress and neurodegenerative diseases: a review of upstream and downstream antioxidant therapeutic options. *Curr Neuropharmacol*. 2009; 7:65–74. <https://doi.org/10.2174/157015909787602823>.
42. Floyd RA, Carney JM. Free radical damage to protein and DNA: mechanisms involved and relevant observations on brain undergoing oxidative stress. *Ann Neurol*. 1992; 32: S22–7. <https://doi.org/10.1002/ana.410320706>.
43. Praticò D. Oxidative imbalance and lipid peroxidation in Alzheimer's disease. *Drug Dev Res*. 2002; 56:446–51. <https://doi.org/10.1002/ddr.10097>.
44. Emerit J, Edeas M, Bricaire F. Neurodegenerative diseases and oxidative stress. *Biomed pharmacother*. 2004; 58: 39–46. <https://doi.org/10.1016/j.biopha.2003.11.004>.
45. Cejas P, Casado E, Belda-Iniesta C, De Castro J, Espinosa E, Redondo A, Sereno M, García-Cabezas MA, Vara JA, Domínguez-Cáceres A, Perona R, González-Barón M. Implications of oxidative stress and cell membrane lipid peroxidation in human cancer (Spain). *Cancer Causes Control*. 2004; 15:707–19. <https://doi.org/10.1023/B:CACO.0000036189.61607.52>.
46. Azad MB, Chen Y, Gibson SB. Regulation of autophagy by reactive oxygen species (ROS): implications for cancer progression and treatment. *Antioxid Redox Signal*. 2009; 11:777–90. <https://doi.org/10.1089/ARS.2008.2270>.
47. Yuzhalin AE, Kutikhin AG. Inherited variations in the SOD and GPX gene families and cancer risk. *Free Radic Res*. 2012; 46:581–99. <https://doi.org/10.3109/10715762.2012.658515>.
48. Kang D, Lee KM, Park SK, Berndt SI, Peters U, Reding D, Chatterjee N, Welch R, Chanock S, Huang WY, Hayes RB. Functional variant of manganese superoxide dismutase (SOD2 V16A) polymorphism is associated with prostate cancer risk in the prostate, lung, colorectal, and ovarian cancer study. *Cancer Epidemiol Biomarkers Prev*. 2007; 16:1581–6. <https://doi.org/10.1158/1055-9965.EPI-07-0160>.
49. Knight JA, Onay UV, Wells S, Li H, Shi EJ, Andrulis IL, Ozelik H. Genetic variants of GPX1 and SOD2 and breast cancer risk at the Ontario site of the Breast Cancer Family Registry. *Cancer Epidemiol Biomarkers Prev*. 2004; 13:146–9. <https://doi.org/10.1158/1055-9965.EPI-03-0164>.
50. Satomi A, Murakami S, Hashimoto T, Ishida K, Matsuki M, Sonoda M. Significance of superoxide dismutase (SOD) in human colorectal cancer tissue: correlation with malignant intensity. *J Gastroenterol*. 1995; 30:177–82. <https://doi.org/10.1007/BF02348662>.
51. Wang Z, Zhang Y, Banerjee S, Li Y, Sarkar FH. Notch-1 down-regulation by curcumin is associated with the inhibition of cell growth and the induction of apoptosis in pancreatic cancer cells. *Cancer*. 2011; 106:2503–13. <https://doi.org/10.1002/cncr.21904>.
52. Dang CV. MYC on the path to cancer. *Cell*. 2012; 149: 22–35. <https://doi.org/10.1016/j.cell.2012.03.003>.
53. Lockshin RA, Zakeri Z. Programmed cell death and apoptosis: origins of the theory. *Nat Rev Mol Cell Biol*. 2001; 2:545–50. <https://doi.org/10.1038/35080097>.
54. Manning BD, Cantley LC. AKT/PKB signaling: navigating downstream. *Cell*. 2007; 129:1261–74. <https://doi.org/10.1016/j.cell.2007.06.009>.
55. Plas DR, Thompson CB. Akt-dependent transformation: there is more to growth than just surviving. *Oncogene*. 2005; 24:7435–42. <https://doi.org/10.1038/sj.onc.1209097>.
56. Matés JM, Segura JA, Alonso FJ, Márquez J. Oxidative stress in apoptosis and cancer: an update. *Arch Toxicol*. 2012; 86:1649–65. <https://doi.org/10.1007/s00204-012-0906-3>.
57. Cottone S, Lorito MC, Riccobene R, Nardi E, Mulè G, Buscemi S, Geraci C, Guarneri M, Arsena R, Cerasola G. Oxidative stress, inflammation and cardiovascular disease in chronic renal failure. *J Nephrol*. 2008; 21:175–9.
58. Vaziri ND, Rodríguez-Iturbe B. Mechanisms of disease: oxidative stress and inflammation in the pathogenesis of hypertension. *Nat Clin Pract Nephrol*. 2006; 2:582–93. <https://doi.org/10.1038/ncpneph0283>.
59. MacNee W. Oxidative stress and lung inflammation in airways disease. *Eur J Pharmacol*. 2001; 429:195–207. [https://doi.org/10.1016/S0014-2999\(01\)01320-6](https://doi.org/10.1016/S0014-2999(01)01320-6).
60. Dröge W. Free radicals in the physiological control of cell function. *Physiol Rev*. 2002; 82:47–95. <https://doi.org/10.1152/physrev.00018.2001>.
61. Galle J. Oxidative stress in chronic renal failure. *Nephrol Dial Transplant*. 2001; 16:2135–42. <https://doi.org/10.1093/ndt/16.11.2135>.
62. Calhau C, Santos A. Oxidative stress in the metabolic syndrome. In: Soares R, Costa C, eds. *Oxidative stress, inflammation and angiogenesis in the metabolic syndrome*. Springer Netherlands. 2009. <https://doi.org/10.1007/978-1-4020-9701-0>.
63. Pitocco D, Zaccardi F, Di Stasio E, Romitelli F, Santini SA, Zuppi C, Ghirlanda G. Oxidative stress, nitric oxide, and diabetes. *Rev Diabet Stud*. 2010; 7:15–25. <https://doi.org/10.1900/RDS.2010.7.15>.
64. Wright E Jr, Scism-Bacon JL, Glass LC. Oxidative stress in type 2 diabetes: the role of fasting and postprandial glycaemia. *Int J Clin Pract*. 2006; 60:308–14. <https://doi.org/10.1111/j.1368-5031.2006.00825.x>.
65. Neki NS. Oxidative stress and aging. *Bangladesh J Med Sci*. 2015; 14:221–7. <https://doi.org/10.3329/bjms.v14i3.23468>.
66. Santosa S, Jones PJ. Oxidative stress in ocular disease: does lutein play a protective role? *CMAJ*. 2005; 173:861–2. <https://doi.org/10.1503/cmaj.1031425>.
67. Meyer CH, Sekundo W. Nutritional supplementation to prevent cataract formation. *Dev Ophthalmol*. 2005; 38:103–19. <https://doi.org/10.1159/000082771>.
68. Massicot F, Lamouri A, Martin C, Pham-Huy C, Heymans F, Warnet JM, Godfroid JJ, Claude JR. Preventive effects of two PAF-antagonists, PMS 536 and PMS 549, on

- cyclosporin-induced LLC-PK1 oxidative injury. *J Lipid Mediat Cell Signal*. 1997; 15:203–14. [https://doi.org/10.1016/S0929-7855\(96\)00555-X](https://doi.org/10.1016/S0929-7855(96)00555-X).
69. Minuzzo M, Ceribelli M, Pitarque-Marti M, Borrelli S, Erba E, DiSilvio A, D'Incalci M, Mantovani R. Selective effects of the anticancer drug Yondelis (ET-743) on cell-cycle promoters. *Mol Pharmacol*. 2005; 68:1496–503. <https://doi.org/10.1124/mol.105.013615>.
  70. Andrade JP, Assunção M. Protective effects of chronic green tea consumption on age-related neurodegeneration. *Curr Pharm Des*. 2012; 18:4–14. <https://doi.org/10.2174/138161212798918986>.
  71. Mandel SA, Amit T, Weinreb O, Youdim MB. Understanding the broad-spectrum neuroprotective action profile of green tea polyphenols in aging and neurodegenerative diseases. *J Alzheimers Dis*. 2011; 25:187–208. <https://doi.org/10.3233/JAD-2011-101803>.
  72. Scalbert A, Manach C, Morand C, Rémésy C, Jiménez L. Dietary polyphenols and the prevention of diseases. *Crit Rev Food Sci Nutr*. 2005; 45:287–306. <https://doi.org/10.1080/1040869059096>.
  73. Shi X, Ye J, Leonard SS, Ding M, Vallyathan V, Castranova V, Rojanasakul Y, Dong Z. Antioxidant properties of epicatechin-3-gallate and its inhibition of Cr(VI)-induced DNA damage and Cr(IV)- or TPA-stimulated NF-kappaB activation. *Mol Cell Biochem*. 2000; 206:125–32. <https://doi.org/10.1023/A:1007012403691>.
  74. Lee SF, Liang YC, Lin JK. Inhibition of 1,2,4-benzenetriol-generated active oxygen species and induction of phase II enzymes by green tea polyphenols. *Chem Biol Interact*. 1996; 98:283–301. [https://doi.org/10.1016/0009-2797\(95\)03652-0](https://doi.org/10.1016/0009-2797(95)03652-0).
  75. O'Sullivan J, Sheridan J, Mulcahy H, Tenniswood M, Morrissey C. The effect of green tea on oxidative damage and tumour formation in Lobund-Wistar rats. *Eur J Cancer Prev*. 2008; 17:489–501. <https://doi.org/10.1097/CEJ.0b013e3282f0c04e>.
  76. Khan SG, Katiyar SK, Agarwal R, Mukhtar H. Enhancement of antioxidant and phase II enzymes by oral feeding of green tea polyphenols in drinking water to SKH-1 hairless mice: possible role in cancer. *Cancer Res*. 1992; 52:4050–2.
  77. Chandra Mohan KV, Hara Y, Abraham SK, Nagini S. Comparative evaluation of the chemopreventive efficacy of green and black tea polyphenols in the hamster buccal pouch carcinogenesis model. *Clin Biochem*. 2005; 38: 879–86. <https://doi.org/10.1016/j.clinbiochem.2005.06.011>.
  78. Skrzydlewska E, Ostrowska J, Farbiszewski R, Michalak K. Protective effect of green tea against lipid peroxidation in the rat liver, blood serum and the brain. *Phytomedicine*. 2002; 9:232–8. <https://doi.org/10.1078/0944-7113-00119>.
  79. Shibutani S, Takeshita M, Grollman AP. Insertion of specific bases during DNA synthesis past the oxidation-damaged base 8-oxodG. *Nature*. 1991; 349:431–4. <https://doi.org/10.1038/349431a0>.
  80. Anderson RF, Fisher LJ, Hara Y, Harris T, Mak WB, Melton LD, Packer JE. Green tea catechins partially protect DNA from (·)OH radical-induced strand breaks and base damage through fast chemical repair of DNA radicals. *Carcinogenesis*. 2001; 22:1189–93. <https://doi.org/10.1093/carcin/22.8.1189>.
  81. Chen CH, Liu TZ, Chen CH, Wong CH, Chen CH, Lu FJ, Chen SC. The efficacy of protective effects of tannic acid, gallic acid, ellagic acid, and propyl gallate against hydrogen peroxide-induced oxidative stress and DNA damages in IMR-90 cells. *Mol Nutr Food Res*. 2007; 51:962–8. <https://doi.org/10.1002/mnfr.200600230>.
  82. Feng Q, Torii Y, Uchida K, Nakamura Y, Hara Y, Osawa T. Black tea polyphenols, theaflavins, prevent cellular DNA damage by inhibiting oxidative stress and suppressing cytochrome P450 1A1 in cell cultures. *J Agric Food Chem*. 2002; 50:213–20. <https://doi.org/10.1021/jf010875c>.
  83. Kweon MH, Adhami VM, Lee JS, Mukhtar H. Constitutive overexpression of Nrf2-dependent heme oxygenase-1 in A549 cells contributes to resistance to apoptosis induced by epigallocatechin 3-gallate. *J Biol Chem*. 2006; 281: 33761–72. <https://doi.org/10.1074/jbc.M604748200>.
  84. Thakur VS, Gupta K, Gupta S. Green tea polyphenols causes cell cycle arrest and apoptosis in prostate cancer cells by suppressing class I histone deacetylases. *Carcinogenesis*. 2012; 33:377–84. <https://doi.org/10.1093/carcin/bgr277>.
  85. Ropero S, Esteller M. The role of histone deacetylases (HDACs) in human cancer. *Mol Oncol*. 2007; 1:19–25. <https://doi.org/10.1016/j.molonc.2007.01.001>.
  86. Kang DH. Oxidative stress, DNA damage, and breast cancer. *AACN Clin Issues*. 2002; 13:540–9. <https://doi.org/10.1097/00044067-200211000-00007>.
  87. Engel RH, Evens AM. Oxidative stress and apoptosis: a new treatment paradigm in cancer. *Front Biosci*. 2006; 11:300–12. <https://doi.org/10.2741/1798>.
  88. Umeda D, Yano S, Yamada K, Tachibana H. Green tea polyphenol epigallocatechin-3-gallate signaling pathway through 67-kDa laminin receptor. *J Biol Chem*. 2008; 283:3050–8. <https://doi.org/10.1074/jbc.M707892200>.
  89. Lee JH, Song DK, Jung CH, Shin DH, Park J, Kwon TK, Jang BC, Mun KC, Kim SP, Suh SI, Bae JH. (-)-Epigallocatechin gallate attenuates glutamate-induced cytotoxicity via intracellular Ca modulation in PC12 cells. *Clin Exp pharmacol physiol*. 2004; 31:530–536. <https://doi.org/10.1111/j.1440-1681.2004.04044.x>.
  90. Collins QF, Liu HY, Pi J, Liu Z, Quon MJ, Cao W. Epigallocatechin-3-gallate (EGCG), a green tea polyphenol, suppresses hepatic gluconeogenesis through 5'-AMP-activated protein kinase. *J Biol Chem*. 2007; 282:30143–9. <https://doi.org/10.1074/jbc.M702390200>.
  91. Lambert JD, Hong J, Yang GY, Liao J, Yang CS. Inhibition of carcinogenesis by polyphenols: evidence from laboratory investigations. *Am J Clin Nutr*. 2005; 81: 284S–291S.
  92. Adhami VM, Siddiqui IA, Ahmad N, Gupta S, Mukhtar H. Oral consumption of green tea polyphenols inhibits insulin-

- like growth factor-I-induced signaling in an autochthonous mouse model of prostate cancer. *Cancer Res.* 2004; 64:8715–22. <https://doi.org/10.1158/0008-5472.CAN-04-2840>.
93. Hussain T, Gupta S, Adhami VM, Mukhtar H. Green tea constituent epigallocatechin-3-gallate selectively inhibits COX-2 without affecting COX-1 expression in human prostate carcinoma cells. *Int J Cancer.* 2005; 113:660–9. <https://doi.org/10.1002/ijc.20629>.
  94. Sang S, Lee MJ, Hou Z, Ho CT, Yang CS. Stability of tea polyphenol (-)-epigallocatechin-3-gallate and formation of dimers and epimers under common experimental conditions. *J Agric Food Chem.* 2005; 53:9478–84. <https://doi.org/10.1021/jf0519055>.
  95. Halliwell B. Are polyphenols antioxidants or pro-oxidants? What do we learn from cell culture and *in vivo* studies? *Arch Biochem Biophys.* 2008; 476:107–12. <https://doi.org/10.1016/j.abb.2008.01.028>.
  96. Azam S, Hadi N, Khan NU, Hadi SM. Prooxidant property of green tea polyphenols epicatechin and epigallocatechin-3-gallate: implications for anticancer properties. *Toxicol In Vitro.* 2004; 18:555–61. <https://doi.org/10.1016/j.tiv.2003.12.012>.
  97. Liu X, Li J, Wang Y, Li T, Zhao J, Zhang C. Green tea polyphenols function as prooxidants to inhibit *Pseudomonas aeruginosa* and induce the expression of oxidative stress-related genes. *Folia Microbiol (Praha).* 2013; 58:211–7. <https://doi.org/10.1007/s12223-012-0198-2>.
  98. Khan N, Bharali DJ, Adhami VM, Siddiqui IA, Cui H, Shabana SM, Mousa SA, Mukhtar H. Oral administration of naturally occurring chitosan-based nanoformulated green tea polyphenol EGCG effectively inhibits prostate cancer cell growth in a xenograft model. *Carcinogenesis.* 2014; 35:415–23. <https://doi.org/10.1093/carcin/bgt321>.
  99. Li GX, Chen YK, Hou Z, Xiao H, Jin H, Lu G, Lee MJ, Liu B, Guan F, Yang Z, Yu A, Yang CS. Pro-oxidative activities and dose-response relationship of (-)-epigallocatechin-3-gallate in the inhibition of lung cancer cell growth: a comparative study *in vivo* and *in vitro*. *Carcinogenesis.* 2010; 31:902–10. <https://doi.org/10.1093/carcin/bgq039>.
  100. Galati G, Lin A, Sultan AM, O'Brien PJ. Cellular and *in vivo* hepatotoxicity caused by green tea phenolic acids and catechins. *Free Radic Biol Med.* 2006; 40:570–80. <https://doi.org/10.1016/j.freeradbiomed.2005.09.014>.
  101. Mazzanti G, Menniti-Ippolito F, Moro PA, Cassetti F, Raschetti R, Santuccio C, Mastrangelo S. Hepatotoxicity from green tea: a review of the literature and two unpublished cases. *Eur J Clin Pharmacol.* 2009; 65:331–41. <https://doi.org/10.1007/s00228-008-0610-7>.
  102. Heber D, Zhang Y, Yang J, Ma JE, Henning SM, Li Z. Green tea, black tea, and oolong tea polyphenols reduce visceral fat and inflammation in mice fed high-fat, high-sucrose obesogenic diets. *J Nutr.* 2014; 144:1385–93. <https://doi.org/10.3945/jn.114.191007>.
  103. Mehrabian S. The Study of Antioxidant and Anticarcinogenic Green Tea and Black Tea. *Pak J Biol Sci.* 2007; 10:989–91. <https://doi.org/10.3923/pjbs.2007.989.991>.
  104. Beltz LA, Bayer DK, Moss AL, Simet IM. Mechanisms of Cancer Prevention by Green and Black Tea Polyphenols. *Anticancer Agents Med Chem.* 2006; 6:389–406. <https://doi.org/10.2174/187152006778226468>.
  105. Villaño D, Lettieri-Barbato D, Guadagni F, Schmid M, Serafini M. Effect of acute consumption of oolong tea on antioxidant parameters in healthy individuals. *Food Chem.* 2012; 132:2102–6. <https://doi.org/10.1016/j.foodchem.2011.12.064>.
  106. Frei B, Higdon JV. Antioxidant activity of tea polyphenols *in vivo*: evidence from animal studies. *J Nutr.* 2003; 133:3275S–84S.
  107. Sun S, Pan S, Ling C, Miao A, Pang S, Lai Z, Chen D, Zhao C. Free radical scavenging abilities *in vitro* and antioxidant activities *in vivo* of black tea and its main polyphenols. *J Med Plants Res.* 2012; 6:114–21. <https://doi.org/10.5897/jmpr11.1308>.
  108. Benzie IF, Szeto YT. Total antioxidant capacity of teas by the Ferric reducing/antioxidant power assay. *J Agric Food Chem.* 1999; 47:633–6. <https://doi.org/10.1021/jf9807768>.
  109. Rechner AR, Wagner E, Van Buren L, Van De Put F, Wiseman S, Rice-Evans CA. Black tea represents a major source of dietary phenolics among regular tea drinkers. *Free Radic Res.* 2009; 36:1127–35. <https://doi.org/10.1080/1071576021000006707>.
  110. Bancirova M. Comparison of the antioxidant capacity and the antimicrobial activity of black and green tea. *Food Res Int.* 2010; 43:1379–82. <https://doi.org/10.1016/j.foodres.2010.04.020>.
  111. Halder J, Bhaduri AN. Protective role of black tea against oxidative damage of human red blood cells. *Biochem Biophys Res Commun.* 1998; 244:903–7. <https://doi.org/10.1006/bbrc.1998.8366>.
  112. Sharma V, Rao LJ. A thought on the biological activities of black tea. *Crit Rev Food Sci Nutr.* 2009; 49:379–404. <https://doi.org/10.1080/10408390802068066>.
  113. Kuhnert N, Drynan JW, Obuchowicz J, Clifford MN, Witt M. Mass spectrometric characterization of black tea thearubigins leading to an oxidative cascade hypothesis for thearubigin formation. *Rapid Commun Mass Spectrom.* 2010; 24:3387–404. <https://doi.org/10.1002/rcm.4778>.
